# Supplementary material
Source: PubMed Central journal article supplement (PMC4136214)

1 Fig. S1. Complementation of *psma* with the pTx $\Delta$  plasmid does not restore secretion of Hla. (A)  
2 Anti-Hla immunoblot of bacterial supernatants harvested after three hours of growth. (B) qRT-  
3 PCR analysis of *psma1* levels of *psm* mutant and complemented strain at three hours and eight  
4 hours of growth. \* indicates statistical significance compared to WT for each time point.

5

6 Fig S2. Exogenous addition of auto-inducing peptide does not restore *psma*-mediated defect in  
7 Hla secretion. Anti-Hla immunoblot of bacterial strains grown in TSB supplemented with 10%  
8 filtered *S. aureus*  $\Delta hla$  supernatant.

**Fig. S1**

**A**

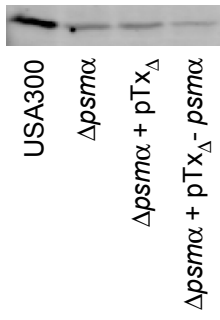

**B**

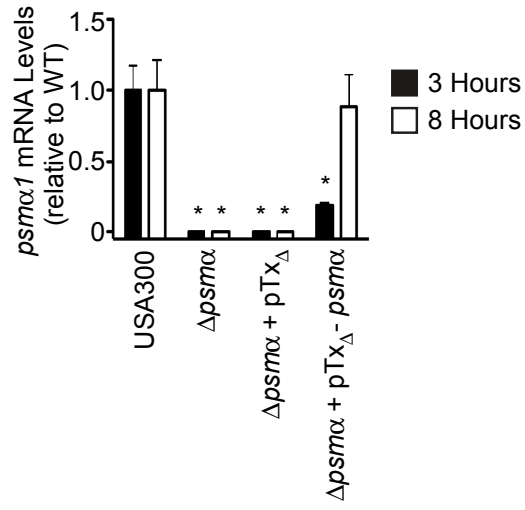

**Fig. S2**

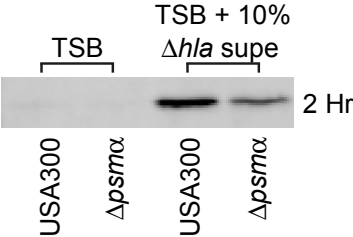

Supplement: IAI.00089-14_zii999090796so1.pdf [file IAI.00089-14_zii999090796so1.pdf]
